# Supplementary material for: A Time-Series Analysis of the 20th Century Climate Simulations Produced for the IPCC’s Fourth Assessment Report
Source: PubMed Central journal article supplement (PMC3610752; doi:10.1371/journal.pone.0060017), 2013-03-28
Supplement: pone.0060017.s001.pdf [file pone.0060017.s001.pdf]

Table S1. Standard unit root tests applied to global temperature simulations and radiative forcing series. The entries show the test statistic value of the corresponding unit root/stationarity test. The lag length is given in parentheses. The model specification includes a constant and a linear trend. Figures in bold indicate that the test statistic is significant at the 5% level.

| Series       | ADF                   | DF-GLS                | KPSS          | ERS-PO               | Ng-Perron      |      |
|--------------|-----------------------|-----------------------|---------------|----------------------|----------------|------|
| CCCMA        | 1.2286<br>(5)         | 0.3160<br>(4)         | <b>0.3556</b> | 191.8251<br>(5)      | 0.7635 (MZa)   | (3)  |
|              |                       |                       |               |                      | 0.3572 (MZt)   |      |
|              |                       |                       |               |                      | 0.4679 (MSB)   |      |
|              |                       |                       |               |                      | 59.109 (MPT)   |      |
| ECHAM5 MPI 1 | -1.5503<br>(7)        | -1.1852<br>(7)        | <b>0.3362</b> | 32.0253<br>(7)       | -2.6775 (MZa)  | (7)  |
|              |                       |                       |               |                      | -1.0730 (MZt)  |      |
|              |                       |                       |               |                      | 0.4007 (MSB)   |      |
|              |                       |                       |               |                      | 31.285 (MPT)   |      |
| ECHAM5MPI 2  | -0.9211<br>(11)       | -1.1370<br>(11)       | <b>0.2726</b> | 29.1359<br>(11)      | -0.1321 (MZa)  | (7)  |
|              |                       |                       |               |                      | -0.2265 (MZt)  |      |
|              |                       |                       |               |                      | 1.7139 (MSB)   |      |
|              |                       |                       |               |                      | 538.580 (MPT)  |      |
| ECHAM5 MPI 3 | -1.2011<br>(9)        | -1.2635<br>(9)        | <b>0.2852</b> | 35.6076<br>(9)       | -2.1167 (MZa)  | (11) |
|              |                       |                       |               |                      | -0.9619 (MZt)  |      |
|              |                       |                       |               |                      | 0.4544 (MSB)   |      |
|              |                       |                       |               |                      | 39.445 (MPT)   |      |
| ECHAM5 MPI 4 | <b>-4.7074</b><br>(2) | -2.2816<br>(5)        | <b>0.2279</b> | <b>4.1871</b><br>(2) | -1.1700 (MZa)  | (12) |
|              |                       |                       |               |                      | -0.5147 (MZt)  |      |
|              |                       |                       |               |                      | 0.4399 (MSB)   |      |
|              |                       |                       |               |                      | 43.147 (MPT)   |      |
| HADLEY CM3 1 | -2.7749<br>(2)        | -2.8283<br>(2)        | <b>0.2936</b> | 6.1165<br>(2)        | -3.12956 (MZa) | (10) |
|              |                       |                       |               |                      | -1.16178 (MZt) |      |
|              |                       |                       |               |                      | 0.37123 (MSB)  |      |
|              |                       |                       |               |                      | 27.0944 (MPT)  |      |
| HADLEY CM3 2 | -0.3803<br>(7)        | -0.4268<br>(7)        | <b>0.3192</b> | 52.0889<br>(7)       | -1.6343 (MZa)  | (7)  |
|              |                       |                       |               |                      | -0.6939 (MZt)  |      |
|              |                       |                       |               |                      | 0.4246 (MSB)   |      |
|              |                       |                       |               |                      | 38.7708 (MPT)  |      |
| GFDL CM2.0 1 | -2.1086<br>(3)        | -1.8418<br>(3)        | <b>0.1570</b> | 12.7112<br>(3)       | -7.6997 (MZa)  | (3)  |
|              |                       |                       |               |                      | -1.8047 (MZt)  |      |
|              |                       |                       |               |                      | 0.2344 (MSB)   |      |
|              |                       |                       |               |                      | 12.2293 (MPT)  |      |
| GFDL CM21 1  | -2.4141<br>(4)        | -2.1679<br>(4)        | 0.1147        | 12.1291<br>(4)       | -4.5621 (MZa)  | (7)  |
|              |                       |                       |               |                      | -1.3217 (MZt)  |      |
|              |                       |                       |               |                      | 0.2897 (MSB)   |      |
|              |                       |                       |               |                      | 18.6679 (MPT)  |      |
| GFDL CM21 2  | <b>-3.8855</b><br>(2) | <b>-3.7399</b><br>(2) | 0.0748        | 3.9746<br>(2)        | -10.511 (MZa)  | (7)  |
|              |                       |                       |               |                      | -2.1926 (MZt)  |      |
|              |                       |                       |               |                      | 0.2086 (MSB)   |      |
|              |                       |                       |               |                      | 9.1576 (MPT)   |      |
| GFDL CM21 3  | -3.4215<br>(3)        | -2.6597<br>(3)        | 0.1014        | 6.7365<br>(3)        | -10.462 (MZa)  | (4)  |
|              |                       |                       |               |                      | -2.2831 (MZt)  |      |
|              |                       |                       |               |                      | 0.2182 (MSB)   |      |
|              |                       |                       |               |                      | 8.7303 (MPT)   |      |
| GISS AOM 1   | -0.4115               | -0.6654               | <b>0.3031</b> | 73.7630              | -0.7532 (MZa)  | (5)  |

|            |                |         |               |               |                |       |      |
|------------|----------------|---------|---------------|---------------|----------------|-------|------|
|            | (5)            | (3)     |               | (5)           | -0.3639        | (MZt) |      |
|            |                |         |               |               | 0.4831         | (MSB) |      |
|            |                |         |               |               | 51.866         | (MPT) |      |
| GISS AOM 2 | <b>-3.9531</b> | -2.5734 | <b>0.2048</b> | 5.7746        | -2.7044        | (MZa) | (6)  |
|            | <b>(0)</b>     | (1)     |               | (0)           | -0.80368       | (MZt) |      |
|            |                |         |               |               | 0.29718        | (MSB) |      |
|            |                |         |               |               | 23.615         | (MPT) |      |
| IPSL       | -0.7816        | -0.0531 | <b>0.3023</b> | 128.1323      | -0.0015        | (MZa) | (8)  |
|            | (8)            | (8)     |               | (8)           | -0.0009        | (MZt) |      |
|            |                |         |               |               | 0.6337         | (MSB) |      |
|            |                |         |               |               | 87.555         | (MPT) |      |
| TRF        | -2.7258        | -2.2095 | <b>0.3203</b> | <b>0.0966</b> | -6.5087        | (MZa) | (9)  |
|            | (5)            | (11)    |               | (12)          | -1.7097        | (MZt) |      |
|            |                |         |               |               | 0.2627         | (MSB) |      |
|            |                |         |               |               | 14.040         | (MPT) |      |
| WM_GHG     | -2.7440        | -2.8414 | <b>0.3387</b> | <b>4.6058</b> | <b>-198.70</b> | (MZa) | (11) |
|            | (7)            | (7)     |               | (8)           | <b>-9.9324</b> | (MZt) |      |
|            |                |         |               |               | <b>0.0500</b>  | (MSB) |      |
|            |                |         |               |               | <b>0.5569</b>  | (MPT) |      |
| SOLAR      | 0.6108         | -0.8866 | <b>0.2674</b> | 125.9262      | -0.1105        | (MZa) | (8)  |
|            | (8)            | (9)     |               | (8)           | -0.0721        | (MZt) |      |
|            |                |         |               |               | 0.6522         | (MSB) |      |
|            |                |         |               |               | 90.547         | (MPT) |      |
