# Supplementary material for: A Time-Series Analysis of the 20th Century Climate Simulations Produced for the IPCC’s Fourth Assessment Report
Source: PubMed Central journal article supplement (PMC3610752; doi:10.1371/journal.pone.0060017), 2013-03-28
Supplement: pone.0060017.s002.pdf [file pone.0060017.s002.pdf]

Table S2. Nonparametric nonlinear co-trending test for TRF, SOLAR, WM\_GHG,  $T^{avg}$  and  $T^{cru}$ . Bold figures denote statistical significance at the 10% level.

| r | WM_GHG, $T^{avg}$ | TRF, $T^{avg}$ | TRF, WM_GHG, $T^{avg}$ | SOLAR, $T^{avg}$ | $T^{cru}$ , $T^{avg}$ |
|---|-------------------|----------------|------------------------|------------------|-----------------------|
| 1 | 0.05789           | 0.08033        | 0.05578                | <b>0.14461</b>   | 0.05195               |
| 2 | <b>0.31774</b>    | <b>0.30835</b> | 0.09681                | <b>0.30793</b>   | <b>0.31276</b>        |
| 3 | --                | --             | <b>0.32841</b>         | --               | --                    |
