# Supplementary material for: A Time-Series Analysis of the 20th Century Climate Simulations Produced for the IPCC’s Fourth Assessment Report
Source: PubMed Central journal article supplement (PMC3610752; doi:10.1371/journal.pone.0060017), 2013-03-28
Supplement: pone.0060017.s004.pdf [file pone.0060017.s004.pdf]

1 **Text S1**

2 A time-series analysis of the 20th century climate simulations produced for the  
3 IPCC's AR4

4

5 F. Estrada, P. Perron, C. Gay-García, B. Martínez-López

6

7 *1.1. DS, cointegrated processes and TS*

8 If a series is stationary around an appropriately defined trend it is said to be integrated  
9 of order zero or I(0), if the deviations from the trend have to be differenced once to  
10 achieve stationarity it is I(1), or I(2) if it has to be differenced twice. An example of  
11 an I(1) process is a first order autoregressive process, in which the coefficient of the  
12 autoregressive term is equal to one, e.g.,

13 
$$y_t = y_{t-1} + e_t \dots(1)$$

14 or

15 
$$\Delta y_t = e_t$$

16 where  $\Delta = (1-L)$  is the difference operator,  $e_t \sim i.i.d(0, \sigma^2)$  is a white noise process,  
17 which could be extended to an ARMA process satisfying the stationarity and  
18 invertibility conditions. This model, also known as random walk, has a stochastic  
19 trend, as can be shown by solving the difference equation (1):

20

21 
$$y_t = y_0 + \sum_{i=0}^{t-1} e_{t-i}$$

22

1 where  $y_0$  is the initial condition and  $\sum_{i=0}^{t-1} e_{t-i} = v_t$  has a stochastic trend, produced by  
2 the sum of the stationary error term [1]. The mean of the process is constant and its  
3 variance increases with time  $Var(y_t) = E(v_t^2) = t\sigma_e^2$  and diverges as  $t \rightarrow \infty$  [2]. A  
4 generalization of equation (1) is a random walk with a drift (a constant term):

$$5 \quad y_t = \beta + y_{t-1} + e_t \dots (2)$$

6 or

$$7 \quad \Delta y_t = \beta + e_t$$

8

9 The solution of this difference equation is

10

$$11 \quad y_t = y_0 + \beta t + \sum_{i=0}^{t-1} e_{t-i}$$

12

13 where  $y_0$  is the initial condition,  $\beta t$  is a deterministic trend and  $\sum_{i=0}^{t-1} e_{t-i} = v_t$  has a  
14 stochastic trend. The variance of this process  $Var(y_t) = E(v_t^2) = t\sigma_e^2$  is time dependent  
15 as in the case of a simple random walk, but the mean  $E(y_t) = y_0 + \beta t$  is no longer  
16 constant.

17

18 Two of the most important features of this type of process are that it is not mean  
19 reverting and that it has infinite memory; shocks do not fade [1]-[2]. The sum of these  
20 random shocks determines the secular movement of the series. That is, all shocks have  
21 permanent effects on the long-run path of temperature. Past and present shocks are as  
22 important for determining the current trend: any shock that occurred even in the

1 distant past is as important as present variations. The long-term forecast is always  
2 influenced by historical events, and temperature predictability is limited, even if  
3 forcing factors are held constant [3]-[4]. It is worth noting that this is not consistent  
4 with the physical fact of climate being a highly dissipative system [5].

5

6 Two integrated variables are said to be cointegrated if there exists a linear  
7 combination of them that produces stationary residuals [6]. Cointegration implies that  
8 there is a long-run equilibrium relationship between two or more variables because  
9 they share the same stochastic trend [7]. To illustrate this concept consider the  
10 following integrated processes:

11  $x_t = \mu_{xt} + \varepsilon_{xt}$

12  $z_t = \mu_{zt} + \varepsilon_{zt}$

13 where  $\mu_{xt}$ ,  $\mu_{zt}$  are unit root processes which contain a stochastic trend and  $\varepsilon_{xt}$ ,  $\varepsilon_{zt}$  are  
14 stationary noise processes. For these two variables to be cointegrated there must exist  
15 a linear combination  $\alpha_1 x_t + \alpha_2 z_t$  ( $\alpha_1$ ,  $\alpha_2$  are different from zero) such that

16  $\mu_{xt} - \frac{\alpha_2}{\alpha_1} \mu_{zt}$  is stationary, indicating that the stochastic trends  $\mu_{xt}$ ,  $\mu_{zt}$  are identical

17 up to a scalar. Consequently,  $x_t$  and  $z_t$  share a common secular movement and a  
18 regression between these two variables will produce stationary residuals.

19

20 In the application of cointegration techniques to climate variables this common  
21 stochastic trend has been interpreted as the fingerprint of anthropogenic activities in  
22 global and hemispheric temperatures. It should be noted however that a requirement  
23 for this concept is *the existence of stochastic trends*. If the variables are for example

1 I(0) and I(1) the cointegration representation does not exist and spurious cointegration  
2 is likely to occur (e.g., [8]-[10]).

3

4 On the other hand, a trend stationary process consists of a deterministic component  
5 plus a stochastic process which can range from a simple white noise to a variety of  
6 different types of autoregressive and moving average structures such as AR, MA,  
7 ARMA. A simple example of this class of process is an AR(1) equation of the form:

8

$$\begin{aligned} 9 \quad x_t &= \alpha + \tau_t + v_t \\ v_t &= \phi v_{t-1} + e_t \end{aligned} \quad (3)$$

10 where  $\phi$  is a constant satisfying  $|\phi| < 1$ ,  $e_t \sim i.i.d(0, \sigma^2)$  is a white noise process which  
11 could also be extended to an ARMA process satisfying the stationarity and  
12 invertibility conditions,  $\tau_t$  can be any deterministic function of time producing a  
13 variety of linear and nonlinear trends and  $\alpha$  is the intercept of the trend function. The  
14 deterministic component of this process dominates its long run behavior: variations  
15 are transitory and do not change the long run path of the series [11]. These processes  
16 are mean reverting around a trend function of the form  $E(x_t) = \alpha + \tau_t$ . Local scale  
17 monthly temperatures in low and middle latitudes frequently provide examples of  
18 trend stationary processes, for which standard unit root test are able to strongly reject  
19 the null hypothesis of the presence of stochastic trends [e.g., 4].

20

21 It has been shown that when considering the problem of investigating the data  
22 generating process, care must be exercised when the trend function is subject to  
23 changes in level and/or slope [12]. The class of models considered in [12] are special  
24 cases for which the trend function changes only once in the sample. In this case, the

1 usual strategy is to treat such changes as exogenous and they are not explicitly  
 2 modeled via a parametric stochastic structure. Under this parameterization, there are  
 3 only some shocks that can change the long-term behavior of the time series, as  
 4 opposed to the case of a unit root where all shocks produce long-term changes. In the  
 5 climate context, long-term changes are not frequent in the scale of the sample under  
 6 analysis and are produced by important changes in key external forcing factors such  
 7 as Earth orbit changes, solar irradiance, and greenhouse gases concentrations [3].

8

9 In general, the trend parameters and their structural changes are not assumed to be  
 10 deterministic [12]-[13]. In order to illustrate the class of model that applies in such  
 11 cases, consider the following framework [13]:

12

13

$$y_t = \mu_t + \beta_t t + Z_t$$

14

$$A(L)Z_t = B(L)e_t; e_t \sim i.i.d.(0, \sigma_e^2)$$

15

$$\beta_t = \beta_{t-1} + u_t$$

16

$$\mu_t = \mu_{t-1} + v_t$$

17

18 where  $A(L)$  and  $B(L)$  are polynomials in the lag operator  $L$  defined as  $LX_t = X_{t-1}$ . The  
 19 intercept and slope of the trend function are time varying stochastic processes. The  
 20 noise components  $u_t$  and  $v_t$  are modeled as mixtures of normal distributions where  
 21 the realizations from each of these variables are drawn from one of two normal  
 22 distributions, one with high and the other with small or zero variance. These mixtures  
 23 of normal distributions for the error terms  $u_t$  and  $v_t$  can be described as:

24

$$u_t = \lambda_t \gamma_{1t} + (1 - \lambda_t) \gamma_{2t}$$

1 
$$v_t = \kappa_t \delta_{1t} + (1 - \kappa_t) \delta_{2t}$$

2 where  $\gamma_{it} \sim i.i.d.N(0, \sigma_{\gamma_i}^2)$ ,  $\delta_{it} \sim i.i.d.N(0, \sigma_{\delta_i}^2)$  while  $\lambda_t$  and  $\kappa_t$  are Bernoulli variables  
3 that take value one with probability  $\alpha_\lambda$  and  $\alpha_\kappa$  and zero with probability  $(1 - \alpha_\lambda)$  and  
4  $(1 - \alpha_\kappa)$ , respectively. One can then obtain a model with infrequent changes in the  
5 slope and intercept parameters when  $\alpha_\lambda$  and  $\alpha_\kappa$  are close to one and  $\sigma_{\gamma_1}^2$  and  $\sigma_{\delta_1}^2$  are  
6 zero. If  $\sigma_{\gamma_2}^2 > 0$  there will be occasional changes in the slope, and correspondingly if  
7  $\sigma_{\delta_2}^2 > 0$  there will be infrequent changes in the intercept. As mentioned above, in the  
8 case of climate change these breaks in the trend function are driven by changes in key  
9 external forcing factors. When only one break occurs, it becomes difficult to model  
10 the change with a stochastic structure. Hence, the common approach in the literature  
11 has been to consider the change as being ‘exogenous’. We shall adopt this approach in  
12 our various analyses.

13

14 The occurrence of secular co-movement is not restricted to integrated variables and  
15 cointegration is only a particular case of a broader class of processes that share  
16 common time-series features. Trend stationary processes such as those described  
17 above can also exhibit a common secular movement represented by a variety of linear  
18 and nonlinear deterministic trends that may include characteristic features such as  
19 breaks in the trend function. The concept of nonlinear co-trending applied in this  
20 paper is described in section 1.5 of the present supplementary text.

21

## 22 *1.2. Standard unit root tests and the lag length and bandwidth selection*

23 In this paper five of the most commonly used unit root/stationarity tests were applied  
24 to the simulated global temperature and radiative forcing series [14]-[18]. A

1 description of these unit root tests and a discussion of their similarities and differences  
2 is available in the literature (e.g., [1]). For the ADF and DF-GLS tests the lag length  
3 was selected using the Akaike Information Criterion. For the KPSS test, the Bartlett  
4 kernel is used with the bandwidth selected using the Newey-West method [19] which  
5 automatically selects, by means of a nonparametric approach, the number of  
6 autocovariances to use when computing a heteroskedasticity and autocorrelation  
7 consistent covariance matrix. For the ERS-PO, the autoregressive spectral density  
8 estimator is used with the lag length selected using the Akaike Information Criterion.  
9 In the case of the Ng-Perron tests, the AR GLS detrended spectral estimation method  
10 is used with the lag length selected using the Modified Akaike Information Criterion  
11 [18] with the Perron-Qu modification [20].

12

### 13 *1.3. Perron-Yabu testing procedure for structural changes in the trend function*

14 It has been shown that the presence of structural changes can have considerable  
15 implications when investigating time-series properties by means of unit root tests  
16 [12]. This creates a circular problem given that most of the tests for structural breaks  
17 require to correctly identify whether the data generating process is stationary or  
18 integrated. Depending on whether the process is stationary or integrated the limit  
19 distributions of these tests are different and if the process is misidentified the tests will  
20 have poor properties.

21

22 The Perron-Yabu test [21] was designed explicitly to address the problem of testing  
23 for structural changes in the trend function of a univariate time series without any  
24 prior knowledge as to whether the noise component is stationary or contains an  
25 autoregressive unit root. The approach of Perron-Yabu builds on previous work of the

1 same authors who analyzed the problem of hypothesis testing on the slope coefficient  
 2 of a linear trend model when no information about the nature, I(0) or I(1), of the noise  
 3 component is available [22].

4

5 We discuss the case of an autoregressive noise component of order one (AR(1)). A  
 6 more detailed presentation of this case and of other structural change models and  
 7 extensions can be found in [21]. Consider the following data generating process:

$$8 \quad \begin{aligned} y_t &= x_t' \psi + u_t \\ u_t &= \alpha u_{t-1} + e_t \end{aligned}$$

9 for  $t=1, \dots, T$ ;  $e_t \sim \text{i.i.d.}(0, \sigma^2)$ ,  $x_t$  is a  $(r \times 1)$  vector of deterministic components, and  
 10  $\psi$  is a  $(r \times 1)$  vector of unknown parameters which are model specific and described  
 11 in the next paragraphs. The initial condition  $u_0$  is assumed to be bounded in  
 12 probability. The autoregressive coefficient is such that  $|\alpha| \leq 1$  and therefore, both  
 13 integrated and stationary errors are allowed.

14 The interest resides in testing the null hypothesis of  $R\psi = \gamma$  where  $R$  is a  
 15  $(q \times r)$  full rank matrix and  $\gamma$  is a  $(q \times 1)$  vector, where  $q$  is the number of restrictions.  
 16 The restrictions here are used to test for the presence of a structural change in the  
 17 trend function. For this purpose the Perron-Yabu test considers three models where a  
 18 change of intercept and/or slope in the trend function occurs. In what follows, the  
 19 break date is denoted  $T_B = [\lambda_B T]$  for some  $\lambda_B \in (0, 1)$ , where  $[\cdot]$  denotes the largest  
 20 integer that is less than or equal to the argument.  $1(\cdot)$  is the indicator function.

21

22 The model to test for a one-time change in the slope of the trend function is specified  
 23 with  $x_t = (1, t, DT_t^*)'$  and  $\psi = (\mu_0, \beta_0, \beta_1)'$  where  $DT_t^* = 1(t > T_B)(t - T_B)$  so that the



1 trend function is joined at the time of the break. The hypothesis of interest is  $\beta_1 = 0$ .  
2 The testing procedure is based on a Quasi Feasible Generalized Least Squares  
3 approach that uses a superefficient estimate of the sum of the autoregressive  
4 parameters  $\alpha$  when  $\alpha=1$ . The estimate of  $\alpha$  is the OLS estimate obtained from an  
5 autoregression applied to detrended data and is truncated to take value 1 when the  
6 estimate is in a  $T^{-\delta}$  neighborhood of 1. This makes the estimate "super-efficient"  
7 when  $\alpha=1$  and implies that inference on the slope parameter can be performed using  
8 the standard Normal or Chi-square distribution whether  $\alpha=1$  or  $|\alpha|<1$ , when the break  
9 date is known. Theoretical arguments and simulation evidence show that  $\delta=1/2$  is the  
10 appropriate choice. When the break date is unknown, the limit distribution is nearly  
11 the same in the I(0) and I(1) cases when considering the Exp functional of the Wald  
12 test across all permissible dates for a specified equation. Hence, it is possible to have  
13 tests with nearly the same size in both cases. To improve the finite sample properties  
14 of the test, they also use the Roy-Fuller bias-corrected version of the OLS estimate of  
15  $\alpha$  [23].

16

17 The testing procedure suggested by the authors is:

18 1) For any given break date, detrend the data by Ordinary Least Squares (OLS)

19 to obtain the residuals  $\hat{u}_t$ ;

20 2) Estimate an AR(1) model for  $\hat{u}_t$  yielding the estimate  $\hat{\alpha}$ ;

21 3) Use  $\hat{\alpha}$  to get the Roy-Fuller biased corrected estimates  $\hat{\alpha}_M$ ;

22 4) Apply the truncation

23 
$$\hat{\alpha}_{MS} = \begin{cases} \hat{\alpha}_M & \text{if } |\hat{\alpha}_M - 1| > T^{-1/2} \\ 1 & \text{if } |\hat{\alpha}_M - 1| \leq T^{-1/2} \end{cases}$$

1           5) Apply a Generalized Least Squares (GLS) procedure with  $\hat{\alpha}_{MS}$  to obtain the  
2 coefficients of the trend and the variance of the residuals and construct the standard  
3 Wald-statistic  $W_{FMS}$ .

4           6) Since the break date is assumed to be unknown, the 5 steps above must be  
5 repeated for all permissible break dates to construct the Exp functional of the Wald  
6 test denoted by

$$7 \quad \text{Exp} - W_{FS} = \log \left[ T^{-1} \sum_{\Lambda} \exp \left( \frac{1}{2} W_{FMS}(\lambda) \right) \right]$$

8 where  $\Lambda = \{\lambda; \varepsilon \leq \lambda \leq 1 - \varepsilon\}$  for some  $\varepsilon > 0$ .  $\varepsilon = 0.15, 0.10$  and  $0.05$  are commonly  
9 used in the literature.

10

#### 11 *1.4. The Perron and Kim-Perron unit root tests*

12 Perron [12] proposed an extension of the Augmented Dickey-Fuller (ADF) test [14]-  
13 [15] that allows for a one-time break in the trend function of a univariate time series.

14 Three different model specifications were considered: the "crash" model that allows  
15 for an exogenous change in the level of the series; the "changing growth" model that  
16 permits an exogenous change in the rate of growth; and a third model that allows both  
17 changes. For this test, the break dates are treated as exogenous in the sense of  
18 intervention analysis [24], separating what can and cannot be explained by the noise  
19 in a time series. Our interest centers in the "changing growth" model, which can be  
20 briefly described as follows. The null hypothesis is:

21

$$22 \quad y_t = \mu_1 + y_{t-1} + (\mu_2 - \mu_1)DU_t + e_t$$

23

1 where  $DU_t = 1$  if  $t > T_B$ , 0 otherwise;  $T_B$  refers to the time of the break, and  
 2  $A(L)e_t = B(L)v_t$ ,  $v_t \sim \text{i.i.d.}(0, \sigma^2)$ , with  $A(L)$  and  $B(L)$   $p$ th and  $q$ th order polynomials,  
 3 respectively, in the lag operator. The innovation series  $\{e_t\}$  are ARMA( $p, q$ ) type with  
 4 possibly unknown  $p, q$  orders. The alternative hypothesis is:

$$5 \quad y_t = \mu + \beta_1 t + (\beta_2 - \beta_1)DT_t^* + e_t$$

6  
 7  
 8 where  $DT_t^* = t - T_B$  if  $t > T_B$  and 0 otherwise. The "changing growth" model takes an  
 9 "additive outlier" approach in which the change is assumed to occur rapidly and the  
 10 regression strategy consists in first detrending the series according the following  
 11 regression:

$$12 \quad y_t = \mu + \beta_1 t + \gamma DT_t^* + \tilde{y}_t \quad (4)$$

13  
 14  
 15 where  $\gamma = (\beta_2 - \beta_1)$ . Then an ADF regression is estimated on the residuals  $\tilde{y}_t$  as  
 16 follows:

$$17 \quad \tilde{y}_t = \alpha \tilde{y}_{t-1} + \sum_{i=1}^k c_i \Delta \tilde{y}_{t-i} + e_t \quad (5)$$

18  
 19  
 20 where the  $k$  lagged values of  $\Delta y_{t-i}$  are added as a parametric correction for  
 21 autocorrelation. In the original Perron test [12] the break is assumed to occur at a  
 22 known date. Later, this test was generalized for the case when the date of the break is  
 23 unknown and he proposed determining the break point endogenously from the data

1 [25]. The break date was originally proposed to be estimated by 1) minimizing the t-  
2 statistic for testing  $\alpha = 1$ ; 2) minimizing/maximizing the t-statistic of the parameter  
3 associated with  $\gamma$  in regression (4) or; 3) maximizing the absolute value of the t-  
4 statistic of  $\gamma$  in regression (4). The resulting unit root test is then the t-statistic for  
5 testing that  $\alpha=1$  in regression (5) estimated by OLS. The critical values of the limit  
6 distribution of the test have been tabulated [25].

7

8 A problem with most procedures for testing for unit roots in the presence of a one-  
9 time break that occurs at an unknown date is that the change in the trend function is  
10 allowed only under the alternative hypothesis of a stationary noise component [25]-  
11 [27]. Consequently, it is possible that a rejection occurs when the noise is I(1) and  
12 there is a large change in the slope of the trend function. A method that avoids this  
13 problem is that of Kim-Perron [28]. Their procedure is based on a pre-test for a  
14 change in the trend function, namely the Perron-Yabu test described above. If this pre-  
15 test rejects, the limit distribution of the unit root test is then the same as if the break  
16 date was known [12], [29]. This is very advantageous since when a break is present  
17 the test has much greater power. It was also shown in simulations to maintain good  
18 size in finite samples and that it offers improvements over other commonly used  
19 methods. The testing procedure under the additive outlier approach for the changing  
20 growth model consists in the following steps:

21

- 22 1. Obtain an estimate of the break date  $\hat{T}_b = \hat{\lambda}T$  by minimizing the sum of  
23 squared residuals from regression (4). Then construct a window around that  
24 estimate defined by a lower bound  $T_l$  and an upper bound  $T_h$ . A window of 9

1 observations was used. Note that the results are not sensitive to this choice  
 2 [28];

3 2. Create a new data set  $\{y^n\}$  by removing the data from  $T_l+1$  to  $T_h$ , and  
 4 shifting down the data after the window by  $S(T) = y_{T_h} - y_{T_l}$ , hence,

$$5 \quad y^n = \begin{cases} y_t & \text{if } t \leq T_l \\ y_{t+T_h-T_l} - S(T) & \text{if } t > T_l \end{cases}$$

6 3. Perform the unit root test using the break date  $T_l$  and compute the  $t$ -test  
 7 statistic for testing  $\tilde{\alpha} = 1$ , denoted by  $t_\alpha(\hat{\lambda}_{T_r}^{AO})$ , from the following OLS  
 8 regression:

$$9 \quad \tilde{y}_t^n = \tilde{\alpha} \tilde{y}_{t-1}^n + \sum_{i=1}^k \tilde{\zeta}_i \Delta \tilde{y}_{t-i}^n + \tilde{\varepsilon}_t \quad (6)$$

10 where  $\hat{\lambda}_{T_r}^{AO} = T_l/T_r$ ,  $T_r = T - (T_h - T_l)$  and  $\tilde{y}_t^n$  is the detrended value of  $y^n$ .

11

12 The number of lags in (5) and (6) was chosen using the Schwarz Information  
 13 Criterion (BIC) but the results are in general robust to alternative methods for  
 14 choosing the lag length such as the Akaike Information Criterion (AIC) or the  
 15 Hannan-Quinn criterion (HQ). In all cases, no evidence of remaining autocorrelation  
 16 was found based on Ljung-Box tests applied to the residuals.

17

### 18 1.5. Bierens nonparametric nonlinear co-trending test

19 Nonlinear co-trending is special case of the more general "common features" concept  
 20 [30]. The advantage of the test proposed by Bierens is that the nonlinear trend does  
 21 not have to be parameterized [31]. The nonlinear trend stationarity model can be  
 22 expressed as follows:

$$23 \quad z_t = g(t) + u_t$$

1 with

$$2 \quad g(t) = \beta_0 + \beta_1 t + f(t)$$

3 where  $z_t$  is a  $k$ -variate time series,  $u_t$  is a  $k$ -variate zero-mean stationary process and

4  $f(t)$  is deterministic  $k$ -variate general nonlinear trend function that allows, in

5 particular, structural changes. Nonlinear co-trending occurs when there exists a non-

6 zero vector  $\theta$  such that  $\theta f(t) = 0$ . Hence, the null hypothesis of this test is that the

7 multivariate time series  $z_t$  is nonlinear co-trended, implying that there is one or more

8 linear combinations of the time series that are stationary around a constant or a linear

9 trend. Note that this test is a cointegration test in the case when it is applied to series

10 that contain unit roots.

11 The nonparametric test for nonlinear co-trending is based on the generalized

12 eigenvalues of the matrices  $M_1$  and  $M_2$  defined by:

13

$$14 \quad M_1 = \frac{1}{n} \sum_{t=1}^n \hat{F}\left(\frac{t}{n}\right) \hat{F}\left(\frac{t}{n}\right)'$$

15

16 where

$$17 \quad \hat{F}(x) = \frac{1}{n} \sum_{t=1}^{\lfloor nx \rfloor} (z_t - \hat{\beta}_0 - \hat{\beta}_1 t)$$

18

19 if  $x \in [n^{-1}, 1]$ ,  $F(x) = 0$  if  $x \in [0, n^{-1}]$  with  $\hat{\beta}_0$  and  $\hat{\beta}_1$  being the estimates of the vectors

20 of intercepts and slope parameters in a regression of  $z_t$  on a constant and a time trend;

21 and

22

$$M_2 = \left( \frac{1}{n} \right) \sum_{j=0}^{m-1} \left[ \left( \frac{1}{m} \right) \sum_{j=0}^{m-1} (z_{t-j} - \hat{\beta}_0 - \hat{\beta}_1(t-j)) \right] \left[ \left( \frac{1}{m} \right) \sum_{j=0}^{m-1} (z_{t-j} - \hat{\beta}_0 - \hat{\beta}_1(t-j)) \right]'$$

2

3 where  $m = n^\alpha$  with  $n$  equal to the number of observations and  $\alpha = 0.5$  [31]. Solving

4  $|M_1 - \lambda M_2| = 0$  and denoting the solution  $\hat{\lambda}_r$ , the test statistic is  $n^{1-\alpha} \hat{\lambda}_r$ . The null

5 hypothesis is that there are  $r$  co-trending vectors against the alternative of  $r-1$  co-

6 trending vectors. This test has a non-standard distribution and the critical values have

7 been tabulated [31]. The existence of  $r$  co-trending vectors in  $r+1$  series indicates the

8 presence of  $r$  linear combinations of the series that are stationary around a linear trend

9 and that these series share a single common nonlinear deterministic trend. Such a

10 result indicate a strong secular co-movement in the  $r+1$  series.

11

#### 12 *1.6 Robustness of the unit root test results*

13 In this subsection the robustness of the results about the unit root tests presented in

14 Table 1 of the main text is explored by comparing them to those that can be obtained

15 using the Perron test described above [25]. For this purpose, two of the different

16 methods for selecting the break date for this test were applied. Although both methods

17 are equivalent to choosing the break date by minimizing the sum of squared residuals,

18 the test and the appropriate critical values in each case are different, as explained

19 below.

20

21 The first method consists in maximizing the value of the of the t-statistic of

22 coefficient  $\gamma$  in regression (4) to obtain the test statistic  $t_{\alpha,\gamma}^*$  from regression (5). This

23 method allows to impose a mild prior restriction of a one-sided change ( $\gamma > 0$ ),

24 limiting the analysis to the case of interest of the present paper (i.e., when there is an

1 increase in the rate of growth). This restriction increases the power of the test when  
2 there is indeed a non-zero change in the slope [25]. The existence of breaks in the  
3 slope of the trend function of temperature and radiative forcing series was previously  
4 established using the Perron-Yabu test [21], and consequently this is the relevant test  
5 statistic for investigating their time-series properties. The second method does not  
6 impose any restriction on  $\gamma$  and consists in maximizing the absolute value of the t-  
7 statistic of the coefficient  $\gamma$  to obtain the test statistic  $t_{\alpha,|\gamma|}^*$ . The results obtained  
8 following this procedure are more conservative since no information about the sign of  
9 the change is included and the corresponding critical values are larger in absolute  
10 value. Note that both tests yield exactly the same values. The difference between the  
11 two relates to the assessment of the significance of a given value for the statistic. If  
12 one imposes a prior that the change is positive, the critical values are smaller (in  
13 absolute value) and, hence, the tests is more powerful.

14  
15 Table A1 provides strong evidence on the robustness of the results shown in Table 1  
16 of the main text. Whether the restriction of a one-sided test is imposed or not, results  
17 unambiguously indicate that both the temperature simulations and radiative forcing  
18 series are better represented as trend stationary processes with a one-time break in the  
19 slope of their trend function. For all temperature simulations both  $t_{\alpha,\gamma}^*$  and  $t_{\alpha,|\gamma|}^*$  are  
20 significant at the 1% level, with the exception of GFDL\_CM2.1\_3, for which they are  
21 significant at the 2.5% and 5% levels, respectively. For the radiative forcing series the  
22  $t_{\alpha,\gamma}^*$  is significant at the 1%, 2.5% and 5% levels for SOLAR, TRF and WM\_GHG,  
23 respectively. The results are broadly similar even when using the more conservative  
24 critical values corresponding to  $t_{\alpha,|\gamma|}^*$ . In this case, the test statistic is significant at the



1 1%, 2.5% and 5% levels for SOLAR, TRF and WM\_GHG, respectively. As such, the  
 2 conclusion obtained by applying the Kim-Perron test [28] in that both temperature  
 3 simulations and radiative forcing series can be better described as trend stationary  
 4 processes with a change in their rates of growth is strongly supported by the Perron  
 5 test [25], whether or not a prior restriction on the sign of the change is imposed.

6

7 Table A1. Perron test for a unit root with a one-time break in the trend function. The  
 8 regression model for the unit root tests is defined in equations (4) and (5). The values  
 9 of the estimated parameters are reported in Table 1 of the main text. a, b, c, d denotes  
 10 statistical significance at the 1%, 2.5%, 5% and 10% respectively. The critical values  
 11 are from [25] Table 1, panels (h) and (i).

| Series       | $t_{\alpha,\gamma}^*, t_{\alpha, \gamma }^*$ | Significance level imposing the<br>prior of a positive slope change | Significance level without<br>a prior imposed |
|--------------|----------------------------------------------|---------------------------------------------------------------------|-----------------------------------------------|
| Globe        | -6.6978                                      | a                                                                   | a                                             |
| ECHAM5_1     | -10.5027                                     | a                                                                   | a                                             |
| ECHAM5_2     | -6.7142                                      | a                                                                   | a                                             |
| ECHAM5_3     | -11.1100                                     | a                                                                   | a                                             |
| ECHAM5_4     | -6.2068                                      | a                                                                   | a                                             |
| BCCR         | -6.7843                                      | a                                                                   | a                                             |
| CCCMA        | -9.0049                                      | a                                                                   | a                                             |
| GFDL_CM2.1_1 | -5.0001                                      | a                                                                   | a                                             |
| GFDL_CM2.1_3 | -4.5615                                      | b                                                                   | c                                             |
| GFDL_CM2.0_1 | -5.4219                                      | a                                                                   | a                                             |
| HADLEY_CM3_1 | -5.7231                                      | a                                                                   | a                                             |
| HADLEY_CM3_2 | -8.0815                                      | a                                                                   | a                                             |
| GISS_AOM_1   | -8.2308                                      | a                                                                   | a                                             |
| GISS_AOM_2   | -6.3705                                      | a                                                                   | a                                             |
| IPSL         | -10.1338                                     | a                                                                   | a                                             |
| TRF          | -4.5822                                      | b                                                                   | b                                             |
| WM_GHG       | -4.2380                                      | c                                                                   | d                                             |
| SOLAR        | -9.3831                                      | a                                                                   | a                                             |

12

13 References

- 1 1. Maddala GS, Kim IM (1998) Unit Roots, Cointegration and Structural Change.  
2 Cambridge, UK: Cambridge University Press. 524 p.
- 3 2. Hatanaka M (1996) Time-Series-Based Econometrics. Unit Roots and  
4 Cointegration. Oxford, UK: Oxford University Press. 308 p.
- 5 3. Gay C, Estrada F, Sanchez A (2009) Global and hemispheric temperature revisited.  
6 Clim Change 94: 333–349.
- 7 4. Gay C, Estrada F, Conde C (2007) Some implications of time series analysis for  
8 describing climatologic conditions and for forecasting. An illustrative case: Veracruz,  
9 Mexico. Atmosfera 20(2): 147-170.
- 10 5. Peixoto JP, Oort AH (1992) Physics of climate. New York, USA: American  
11 Institute of Physics. 520 p.
- 12 6. Engle RF, Granger CWJ (1987) Co-integration and error correction:  
13 Representation, estimation and testing. Econometrica 55: 251-276.
- 14 7. Stock JH, Watson MW (1988) Variable trends in economic time series. J Econ  
15 Perspect 2(3): 1097-1107.
- 16 8. Gonzalo J, Lee TH (1998) Pitfalls in testing for long run relationships. J  
17 Econometrics 86: 129-154.
- 18 9. Elliott G (1998) On the robustness of cointegration methods when regressors  
19 almost have unit roots. Econometrica 66: 149-158.
- 20 10. Leybourne SJ, Newbold P (2003) Spurious rejections by cointegration tests  
21 induced by structural breaks. App Econ 35: 1117-1121.
- 22 11. Enders W (2003) Applied Econometric Time Series. New York, USA: Wiley. 544  
23 p.
- 24 12. Perron P (1989) The great crash, the oil price shock, and the unit root hypothesis.  
25 Econometrica 57: 1361–1401.

- 1 13. Perron P, Wada T (2009) Let's take a break: Trends and cycles in US real GDP. J  
2 Monet Econ 56: 749-765.
- 3 14. Dickey DA, Fuller WA (1979) Distribution of the Estimators for Autoregressive  
4 Time Series with a Unit Root. J Am Statist Assoc 74: 427–431.
- 5 15. Said E, Dickey DA (1984) Testing for unit roots in autoregressive moving average  
6 models of unknown order. Biometrika 71: 599–607.
- 7 16. Kwiatkowski D, Phillips PCB, Schmidt P, Shin Y (1992) Testing the null  
8 hypothesis of stationarity against the alternative of a unit root. J Econom 54: 159-178.
- 9 17. Elliott G, Rothenberg TJ, Stock JH (1996) Efficient tests for an autoregressive  
10 unit root. Econometrica 64: 813–836.
- 11 18. Ng S, Perron P (2001) Lag Length Selection and the Construction of Unit Root  
12 Tests with Good Size and Power. Econometrica 69: 1519-1554.
- 13 19. Newey WK, West KD (1994) Automatic Lag Selection in Covariance Estimation.  
14 Rev Econ Stud 61: 631-654.
- 15 20. Perron P, Qu Z (2007) A simple modification to improve the finite sample  
16 properties of Ng and Perron's unit root tests. Econ Letters 94: 12-19.
- 17 21. Perron P, Yabu T (2009) Testing for shifts in trend with an integrated or stationary  
18 noise component. JBES 27: 369-396.
- 19 22. Perron P, Yabu T (2009) Estimating deterministic trends with an integrated of  
20 stationary noise component. J Econom 151: 56-69.
- 21 23. Roy A, Fuller WA (2001) Estimation for autoregressive processes with a root near  
22 one. JBES 19: 482-493.
- 23 24. Box GEP, Tiao GC (1975) Intervention Analysis with Applications to Economic  
24 and Environmental Problems. J Amer Statistical Assoc 70: 70-79.

- 1 25. Perron P (1997) Further evidence on breaking trend functions in macroeconomic  
2 variables. *J Econom* 80: 355-385.
- 3 26. Zivot E, Andrews D (1992) Further evidence on the great crash, the oil price  
4 shock, and the unit root hypothesis. *JBES* 10: 251–270.
- 5 27. Vogelsang TJ, Perron P (1998) Additional tests for a unit root allowing the  
6 possibility of breaks in the trend function. *Int Econ Rev* 39: 1073-1100.
- 7 28. Kim D, Perron P (2009) Unit root tests allowing for a break in the trend function  
8 under both the null and the alternative hypotheses. *J Econometrics* 148: 1-13.
- 9 29. Perron P, Vogelsang T (1993) Erratum: The great crash, the oil price shock and  
10 the unit root hypothesis. *Econometrica* 61: 248-249.
- 11 30. Engle RF, Kozicki S (1993) Testing for common features. *JBES* 11: 369-395.
- 12 31. Bierens HJ (2000) Nonparametric nonlinear cotrending analysis, with an  
13 application to interest and inflation in the United States. *JBES* 18: 323-337.
- 14
